# Supplementary material
Source: Springer Nature journal article supplement (https://www.springermedizin.de/resource/supplementary/13019_2010_366_MOESM7_ESM.pdf/9638592)
Supplement: MOESM7 [file 9638592]

**Table 1. Details of included studies**

| Author [ref#]<br>(year)        | Control<br>Period | Subjects (n)           |                          | Glucose ranges<br>mg/dL |           | AF<br>n (%) |             |          | Pacing<br>n (%) |             |          | Time in ICU*<br>Mean ± SD |                 |          | Time on Ventilation<br>Mean ± SD |                |          |
|--------------------------------|-------------------|------------------------|--------------------------|-------------------------|-----------|-------------|-------------|----------|-----------------|-------------|----------|---------------------------|-----------------|----------|----------------------------------|----------------|----------|
|                                |                   | Total<br>(non-DM / DM) | Tight/<br>normal control | Control                 | Tight     | Control     | Tight       | <i>p</i> | Control         | Tight       | <i>p</i> | Control                   | Tight           | <i>p</i> | Control                          | Tight          | <i>p</i> |
| Chaney [12]<br>(1999)          | Peri              | 20 (20/0)              | 10/10                    | -                       | 100 - 150 | 2<br>(20%)  | 4<br>(40%)  | N/A      | N/A             | N/A         | —        | N/A                       | N/A             | —        | N/A                              | N/A            | —        |
| Gandhi [13]<br>(2007)          | Peri              | 400 (327/73)           | 185/186                  | < 200                   | < 100     | 59<br>(32%) | 54<br>(29%) | N/S      | N/A             | N/A         | —        | N/A                       | N/A             | —        | N/A                              | N/A            | —        |
| Groban [16]<br>(2002)          | Peri/Post         | 381 (381/0)            | 188/193                  | -                       | 80 - 120  | 68<br>(35%) | 60<br>(32%) | N/S      | 2<br>(1%)       | 3<br>(2%)   | N/S      | N/A                       | N/A             | —        | 32<br>± 4.0                      | 31<br>± 4.0    | N/A      |
| Hoedemaekers<br>[14]<br>(2005) | Post              | 20 (20/0)              | 10/10                    | < 200                   | 80 - 110  | N/A         | N/A         | —        | N/A             | N/A         | —        | 20.3<br>± 2.5             | 22.1<br>± 1.8   | 0.09     | 9.8<br>± 4.6                     | 11.2<br>± 6.6  | 0.65     |
| Koskenkari [17]<br>(2005)      | Peri              | 40 (40/0)              | 20/20                    | < 180                   | 108 - 180 | 14<br>(70%) | 12<br>(60%) | N/A      | 12<br>(60%)     | 3<br>(15%)  | 0.008    | 48<br>± 28.8              | 76.8 ±<br>112.8 | N/S      | 12.9<br>± 14.2                   | 11.4<br>± 20.1 | 0.095    |
| Lazar [18]<br>(2004)           | Peri              | 141 (N/A)              | 72/69                    | < 250                   | 125 - 200 | 29<br>(42%) | 12<br>16.6% | 0.002    | 27<br>(39%)     | 10<br>13.8% | 0.001    | 32.8<br>±2.6              | 17.3<br>±1.0    | 0.001    | 10.7 ±<br>0.6                    | 6.9<br>± 0.3   | < .001   |
| Ingels [15]<br>(2006)          | Post              | 970 (N/A)              | 477/493                  | < 220                   | < 110     | N/A         | N/A         | —        | N/A             | N/A         | —        | N/A                       | N/A             | —        | N/A                              | N/A            | —        |

| Early Mortality<br>n(%) |             |          |
|-------------------------|-------------|----------|
| Control                 | Tight       | <i>p</i> |
| N/A                     | N/A         | —        |
| N/A                     | N/A         | —        |
| 0<br>(0%)               | 3<br>(1.5%) | N/S      |
| N/A                     | N/A         | —        |
| N/A                     | N/A         | —        |
| 0                       | 0           | N/S      |
| 37                      | 16          | 0.005    |

—
